# Supplementary material for: New Progress on London Dispersive Energy, Polar Surface Interactions and Lewis’s Acid-Base Properties of Solid Surfaces
Source: Preprints.org preprint supplement (doi:10.20944/preprints202401.0638.v1), 2024-01-08
Supplement: Supplementary file 3 [file supplementary]

**Supporting information**

New Progress on Surface specific interactions and Lewis’s acid-base properties of solid surfaces

Tayssir Hamieh1,2

1Faculty of Science and Engineering, Maastricht University, P.O. Box 616, 6200 MD Maastricht, Netherlands

2Laboratory of Materials, Catalysis, Environment and Analytical Methods Laboratory (MCEMA), Faculty of Sciences, Lebanese University, Hadath, Lebanon

Correspondence: Faculty of Science and Engineering, Maastricht University, P.O. Box 616, 6200 MD Maastricht, The Netherlands, E-mail: [t.hamieh@maastrichtuniversity.nl](mailto:t.hamieh@maastrichtuniversity.nl)

**Table S1.** Values (in kJ/mol) of London dispersive energy () of n-alkanes and polar solvents adsorbed on silica particles at different temperatures.

| Temperature T (K) | 323.15 | 343.15 | 363.15 | 383.15 | 403.15 |
| --- | --- | --- | --- | --- | --- |
| C5 | 19.780 | 19.780 | 18.187 | 16.600 | 15.444 |
| C6 | 23.409 | 23.409 | 21.524 | 19.646 | 18.277 |
| C7 | 26.534 | 26.534 | 24.397 | 22.269 | 20.718 |
| C8 | 30.814 | 30.814 | 28.333 | 25.861 | 24.060 |
| C9 | 33.503 | 33.503 | 30.805 | 28.117 | 26.159 |
| CCl4 | 24.557 | 22.516 | 20.703 | 18.896 | 17.580 |
| Nitromethane | 16.440 | 15.074 | 13.860 | 12.651 | 11.770 |
| CH2Cl2 | 16.229 | 14.880 | 13.682 | 12.488 | 11.618 |
| CHCl3 | 19.992 | 18.330 | 16.854 | 15.383 | 14.312 |
| Diethyl ether | 19.744 | 18.102 | 16.645 | 15.192 | 14.134 |
| THF | 17.029 | 15.613 | 14.356 | 13.103 | 12.191 |
| Ethyl Acetate | 19.548 | 17.923 | 16.480 | 15.042 | 13.994 |
| Acetone | 13.404 | 12.289 | 11.300 | 10.314 | 9.595 |
| Acetonitrile | 10.305 | 9.449 | 8.688 | 7.930 | 7.377 |
| Toluene | 23.754 | 21.779 | 20.025 | 18.278 | 17.005 |
| Benzene | 21.295 | 19.525 | 17.953 | 16.386 | 15.245 |

**Table S2.** Values (in kJ/mol) of London dispersive energy () of polar solvents adsorbed on silica particles at different temperatures.

| **Temprature T(K)** | **323.15** | **343.15** | **363.15** | **383.15** | **403.15** |
| --- | --- | --- | --- | --- | --- |
| CCl4 | 6.752 | 6.810 | 6.881 | 6.968 | 7.129 |
| Nitromethane | 13.573 | 12.367 | 11.273 | 10.191 | 9.378 |
| CH2Cl2 | 22.490 | 21.846 | 21.269 | 20.716 | 20.287 |
| CHCl3 | 19.752 | 19.304 | 18.925 | 18.546 | 18.250 |
| Diethyl ether | 26.838 | 25.462 | 23.802 | 22.314 | 20.676 |
| THF | 35.506 | 32.787 | 30.435 | 27.908 | 25.593 |
| Ethyl Acetate | 4.566 | 4.015 | 3.530 | 3.079 | 2.732 |
| Acetone | 10.612 | 9.608 | 8.703 | 7.816 | 7.144 |
| Acetonitrile | 16.734 | 15.304 | 14.016 | 12.738 | 11.793 |
| Toluene | 17.330 | 16.724 | 16.168 | 15.598 | 15.187 |
| Benzene | 5.640 | 5.170 | 4.745 | 4.328 | 4.026 |

**Table S3.** Values (in kJ/mol) of London dispersive energy () of n-alkanes and polar solvents adsorbed on MgO particles at different temperatures.

| Temperature (K) | 323.15 | 343.15 | 363.15 | 383.15 |
| --- | --- | --- | --- | --- |
| C6 | 19.996 | 19.127 | 18.299 | 17.531 |
| C7 | 22.673 | 21.688 | 20.748 | 19.877 |
| C8 | 26.336 | 25.192 | 24.100 | 23.089 |
| C9 | 28.638 | 27.394 | 26.207 | 25.107 |
| CH2Cl2 | 12.689 | 12.138 | 11.612 | 11.125 |
| CHCl3 | 15.630 | 14.951 | 14.303 | 13.703 |
| Diethyl ether | 15.479 | 14.806 | 14.165 | 13.570 |
| THF | 13.353 | 12.773 | 12.220 | 11.707 |
| Ethyl Acetate | 15.313 | 14.648 | 14.013 | 13.425 |
| Acetone | 10.505 | 10.048 | 9.613 | 9.210 |
| Acetonitrile | 8.048 | 7.699 | 7.365 | 7.056 |
| Toluene | 18.645 | 17.835 | 17.062 | 16.346 |

**Table S4.** Values (in kJ/mol) of London dispersive energy () of polar solvents adsorbed on MgO particles at different temperatures.

| T(K) | **323.15** | **343.15** | **363.15** | **383.15** |
| --- | --- | --- | --- | --- |
| CH2Cl2 | 3.312 | 3.786 | 4.532 | 5.211 |
| CHCl3 | 5.833 | 2.693 | 1.560 | 2.176 |
| Diethyl ether | 14.415 | 16.559 | 18.671 | 20.721 |
| THF | 23.053 | 25.004 | 26.928 | 28.797 |
| Ethyl Acetate | 6.224 | 7.620 | 9.112 | 10.523 |
| Acetone | 15.723 | 20.520 | 25.354 | 30.243 |
| Acetonitrile | 24.370 | 26.000 | 27.633 | 29.269 |
| Toluene | 10.771 | 10.471 | 10.192 | 9.945 |

**Table S5.** Values (in kJ/mol) of London dispersive energy () of n-alkanes and polar solvents adsorbed on ZnO particles at different temperatures.

| **T(K)** | 323.15 | 343.15 | 363.15 | 383.15 |
| --- | --- | --- | --- | --- |
| C6 | 12.6777 | 11.3464 | 10.2409 | 9.2860 |
| C7 | 14.4122 | 12.8988 | 11.6421 | 10.5565 |
| C8 | 16.7694 | 15.0085 | 13.5462 | 12.2831 |
| C9 | 18.2572 | 16.3401 | 14.7481 | 13.3728 |
| DCM | 7.9317 | 7.0988 | 6.4071 | 5.8097 |
| TCM | 9.7642 | 8.7389 | 7.8875 | 7.1520 |
| Diethyl ether | 9.8951 | 8.8560 | 7.9932 | 7.2478 |
| THF | 8.5518 | 7.6537 | 6.9080 | 6.2639 |
| Ethyl Acetate | 9.7236 | 8.7025 | 7.8546 | 7.1222 |
| Benzene | 10.7177 | 9.5922 | 8.6577 | 7.8504 |

**Table S6.** Values (in kJ/mol) of London dispersive energy () of polar solvents adsorbed on ZnO particles at different temperatures.

| T(K) | **323.15** | **343.15** | **363.15** | **383.15** |
| --- | --- | --- | --- | --- |
| DCM | 2.449 | 1.915 | 1.223 | 0.632 |
| TCM | 1.151 | 1.061 | 0.999 | 0.933 |
| Diethyl ether | 7.721 | 7.045 | 6.594 | 6.037 |
| THF | 13.596 | 12.901 | 12.294 | 11.517 |
| Ethyl Acetate | 3.955 | 2.715 | 1.800 | 1.042 |
| Benzene | 0.870 | 0.690 | 0.537 | 0.354 |

**Table S7.** Values (in kJ/mol) of London dispersive energy () of n-alkanes and polar solvents adsorbed on monogal-Zn particles at different temperatures.

| T (K) | 323.15 | 343.15 | 363.15 | 383.15 |
| --- | --- | --- | --- | --- |
| C6 | 25.249 | 23.667 | 21.355 | 18.899 |
| C7 | 28.600 | 26.809 | 24.189 | 21.408 |
| C8 | 33.199 | 31.119 | 28.078 | 24.850 |
| C9 | 36.084 | 33.823 | 30.518 | 27.009 |
| DCM | 16.113 | 15.103 | 13.628 | 12.061 |
| TCM | 16.610 | 15.570 | 14.048 | 12.433 |
| Diethyl ether | 15.260 | 14.304 | 12.906 | 11.422 |
| THF | 15.156 | 14.206 | 12.818 | 11.344 |
| Ethyl Acetate | 19.324 | 18.114 | 16.344 | 14.464 |
| Acetone | 15.412 | 14.447 | 13.035 | 11.536 |
| Acetonitrile | 17.138 | 16.064 | 14.494 | 12.828 |
| Toluene | 14.696 | 13.775 | 12.429 | 11.000 |

**Table S8.** Values (in kJ/mol) of London dispersive energy () of polar solvents adsorbed on monogal-Zn particles at different temperatures.

| T(K) | **323.15** | **343.15** | **363.15** | **383.15** |
| --- | --- | --- | --- | --- |
| DCM | 2.354 | 1.965 | 1.426 | 0.854 |
| TCM | 15.001 | 11.698 | 7.938 | 6.927 |
| Diethyl ether | 17.481 | 15.950 | 14.408 | 12.982 |
| THF | 23.786 | 21.503 | 19.298 | 17.285 |
| Ethyl Acetate | 12.287 | 9.154 | 5.642 | 4.895 |
| Acetone | 22.779 | 20.603 | 18.500 | 16.582 |
| Acetonitrile | 19.104 | 16.905 | 14.694 | 12.454 |
| Toluene | 22.246 | 20.175 | 18.138 | 16.267 |

**Table S9.** Values (in kJ/mol) of London dispersive energy () of n-alkanes and polar solvents adsorbed on alumina particles at different temperatures.

| T (K) | 323.15 | 343.15 | 363.15 | 383.15 |
| --- | --- | --- | --- | --- |
| C6 | 21.488 | 20.220 | 19.103 | 18.422 |
| C7 | 24.393 | 22.954 | 21.685 | 20.912 |
| C8 | 28.356 | 26.682 | 25.208 | 24.310 |
| C9 | 30.852 | 29.030 | 27.427 | 26.449 |
| CCl4 | 20.481 | 19.272 | 18.207 | 17.559 |
| CH2Cl2 | 13.549 | 12.749 | 12.044 | 11.615 |
| CHCl3 | 16.684 | 15.699 | 14.832 | 14.303 |
| Ether | 16.696 | 15.710 | 14.842 | 14.313 |
| THF | 14.415 | 13.564 | 12.815 | 12.358 |
| Ethyl acetate | 16.467 | 15.495 | 14.639 | 14.117 |
| Toluene | 20.200 | 19.008 | 17.958 | 17.318 |

**Table S10.** Values (in kJ/mol) of London dispersive energy () of polar solvents adsorbed on alumina particles at different temperatures.

| T(K) | **323.15** | **343.15** | **363.15** | **383.15** |
| --- | --- | --- | --- | --- |
| CCl4 | 6.751 | 6.654 | 6.575 | 6.648 |
| CH2Cl2 | 38.808 | 36.648 | 34.670 | 32.613 |
| CHCl3 | 18.559 | 16.226 | 14.028 | 12.322 |
| Ether | 41.085 | 39.144 | 37.268 | 35.790 |
| THF | 40.532 | 38.377 | 36.371 | 34.878 |
| Ethyl acetate | 11.624 | 9.452 | 7.875 | 6.125 |
| Toluene | 18.821 | 17.490 | 16.418 | 15.980 |

**Table S11.** Values (in kJ/mol) of London dispersive energy () of n-alkanes and polar solvents adsorbed on TiO2 particles at different temperatures.

| T (K) | **313.15** | **333.15** | **353.15** | **373.15** |
| --- | --- | --- | --- | --- |
| C6 | 21.431 | 21.007 | 20.582 | 20.165 |
| C7 | 24.274 | 23.793 | 23.313 | 22.841 |
| C8 | 28.176 | 27.618 | 27.060 | 26.512 |
| C9 | 30.623 | 30.017 | 29.410 | 28.815 |
| CH2Cl2 | 13.681 | 13.410 | 13.139 | 12.873 |
| CHCl3 | 16.855 | 16.521 | 16.187 | 15.859 |
| THF | 14.252 | 13.970 | 13.688 | 13.410 |
| Ethyl Acetate | 16.401 | 16.077 | 15.752 | 15.433 |
| Acetone | 11.233 | 11.010 | 10.788 | 10.569 |
| Benzene | 17.813 | 17.460 | 17.108 | 16.761 |
| Nitromethane | 13.847 | 13.573 | 13.299 | 13.030 |
| Acetonitrile | 8.711 | 8.539 | 8.366 | 8.197 |

**Table S12.** Values (in kJ/mol) of London dispersive energy () of polar solvents adsorbed on TiO2 particles at different temperatures.

| T(K) | **313.15** | **333.15** | **353.15** | **373.15** |
| --- | --- | --- | --- | --- |
| CH2Cl2 | 2.546 | 1.924 | 1.254 | 0.723 |
| CHCl3 | 3.146 | 2.019 | 0.893 |  |
| THF | 7.620 | 6.620 | 5.620 | 4.620 |
| Ethyl Acetate | 3.979 | 2.417 | 0.857 | -0.710 |
| Acetone | 5.776 | 4.068 | 2.362 | 0.651 |
| Benzene | 5.564 | 4.199 | 2.834 | 1.463 |
| Nitromethane | 10.394 | 9.024 | 7.657 | 6.283 |
| Acetonitrile | 4.615 | 2.524 | 0.433 |  |

**Table S13.** Values (in kJ/mol) of London dispersive energy () of n-alkanes and polar solvents adsorbed on untreated carbon fibers particles at different temperatures.

| T (K) | **313.15** | **333.15** | **353.15** | **373.15** |
| --- | --- | --- | --- | --- |
| C6 | 20.723 | 19.965 | 19.206 | 18.959 |
| C7 | 23.452 | 22.594 | 21.736 | 21.456 |
| C8 | 27.206 | 26.211 | 25.215 | 24.891 |
| C9 | 29.558 | 28.476 | 27.395 | 27.042 |
| CCl4 | 20.133 | 19.396 | 18.659 | 18.419 |
| CH2Cl2 | 13.291 | 12.805 | 12.318 | 12.160 |
| CHCl3 | 16.378 | 15.779 | 15.179 | 14.984 |
| Ether | 15.944 | 15.361 | 14.777 | 14.587 |
| THF | 13.736 | 13.234 | 12.731 | 12.567 |
| C6H6 | 17.158 | 16.530 | 15.902 | 15.697 |
| Ethyl acetate | 15.851 | 15.271 | 14.691 | 14.502 |
| Acetone | 10.842 | 10.445 | 10.048 | 9.919 |

**Table S14.** Values (in kJ/mol) of London dispersive energy () of polar solvents adsorbed on untreated carbon fibers particles at different temperatures.

| T(K) | 313.15 | 333.15 | 353.15 | 373.15 |
| --- | --- | --- | --- | --- |
| CCl4 | 1.723 | 1.956 | 2.203 | 2.518 |
| CH2Cl2 | 4.096 | 3.645 | 3.129 | 2.548 |
| CHCl3 | 14.829 | 13.537 | 11.761 | 8.193 |
| Ether | 2.112 | 1.633 | 1.131 | 0.546 |
| THF | 11.852 | 11.079 | 10.310 | 9.748 |
| C6H6 | 8.577 | 8.315 | 8.055 | 8.011 |
| Ethyl acetate | 9.500 | 9.251 | 9.019 | 8.975 |
| Acetone | 10.723 | 10.282 | 9.865 | 9.647 |

**Table S15.** Values (in kJ/mol) of London dispersive energy () of n-alkanes and polar solvents adsorbed on oxidized carbon fibers at different temperatures.

| T (K) | **313.15** | **333.15** | **353.15** | **373.15** |
| --- | --- | --- | --- | --- |
| C6 | 20.674 | 19.429 | 18.209 | 16.997 |
| C7 | 23.396 | 21.988 | 20.607 | 19.236 |
| C8 | 27.142 | 25.507 | 23.906 | 22.315 |
| C9 | 29.488 | 27.712 | 25.972 | 24.244 |
| CCl4 | 20.085 | 18.875 | 17.690 | 16.513 |
| CH2Cl2 | 13.260 | 12.461 | 11.679 | 10.902 |
| CHCl3 | 16.339 | 15.355 | 14.391 | 13.433 |
| Ether | 15.906 | 14.948 | 14.010 | 13.077 |
| THF | 13.704 | 12.879 | 12.070 | 11.267 |
| C6H6 | 17.117 | 16.086 | 15.076 | 14.073 |
| Ethyl acetate | 15.814 | 14.862 | 13.928 | 13.001 |
| Acetone | 10.816 | 10.165 | 9.526 | 8.892 |

**Table S16.** Values (in kJ/mol) of London dispersive energy () of polar solvents adsorbed on oxidized carbon fibers at different temperatures.

| T(K) | 313.15 | 333.15 | 353.15 | 373.15 |
| --- | --- | --- | --- | --- |
| CCl4 | 2.785 | 2.843 | 2.911 | 2.974 |
| CH2Cl2 | 10.546 | 9.952 | 9.379 | 8.800 |
| CHCl3 | 12.788 | 12.228 | 11.685 | 11.134 |
| Ether | 7.399 | 6.965 | 6.548 | 6.124 |
| THF | 17.020 | 15.878 | 14.753 | 13.623 |
| C6H6 | 10.429 | 9.943 | 9.473 | 8.995 |
| Ethyl acetate | 13.212 | 12.718 | 12.242 | 11.758 |
| Acetone | 17.928 | 16.999 | 16.094 | 15.183 |
